# Supplementary material for: Effect of relative humidity on crystal growth, device performance and hysteresis in planar heterojunction perovskite solar cells
Source: Royal Society of Chemistry journal article supplement (doi:10.1039/c5nr04179a), 2015-09-21
Supplement: c5nr04179a1.pdf [file c5nr04179a1.pdf]

## Supplementary Information

# Effect of Relative Humidity on Crystal Growth, Device Performance and Hysteresis in Planar Heterojunction Perovskite Solar Cells

Mahesh K. Gangishetty, Robert W. J. Scott, Timothy L. Kelly\*

Department of Chemistry, University of Saskatchewan  
110 Science Place, Saskatoon, SK, Canada, S7N 5C9

\* e-mail: [tim.kelly@usask.ca](mailto:tim.kelly@usask.ca)

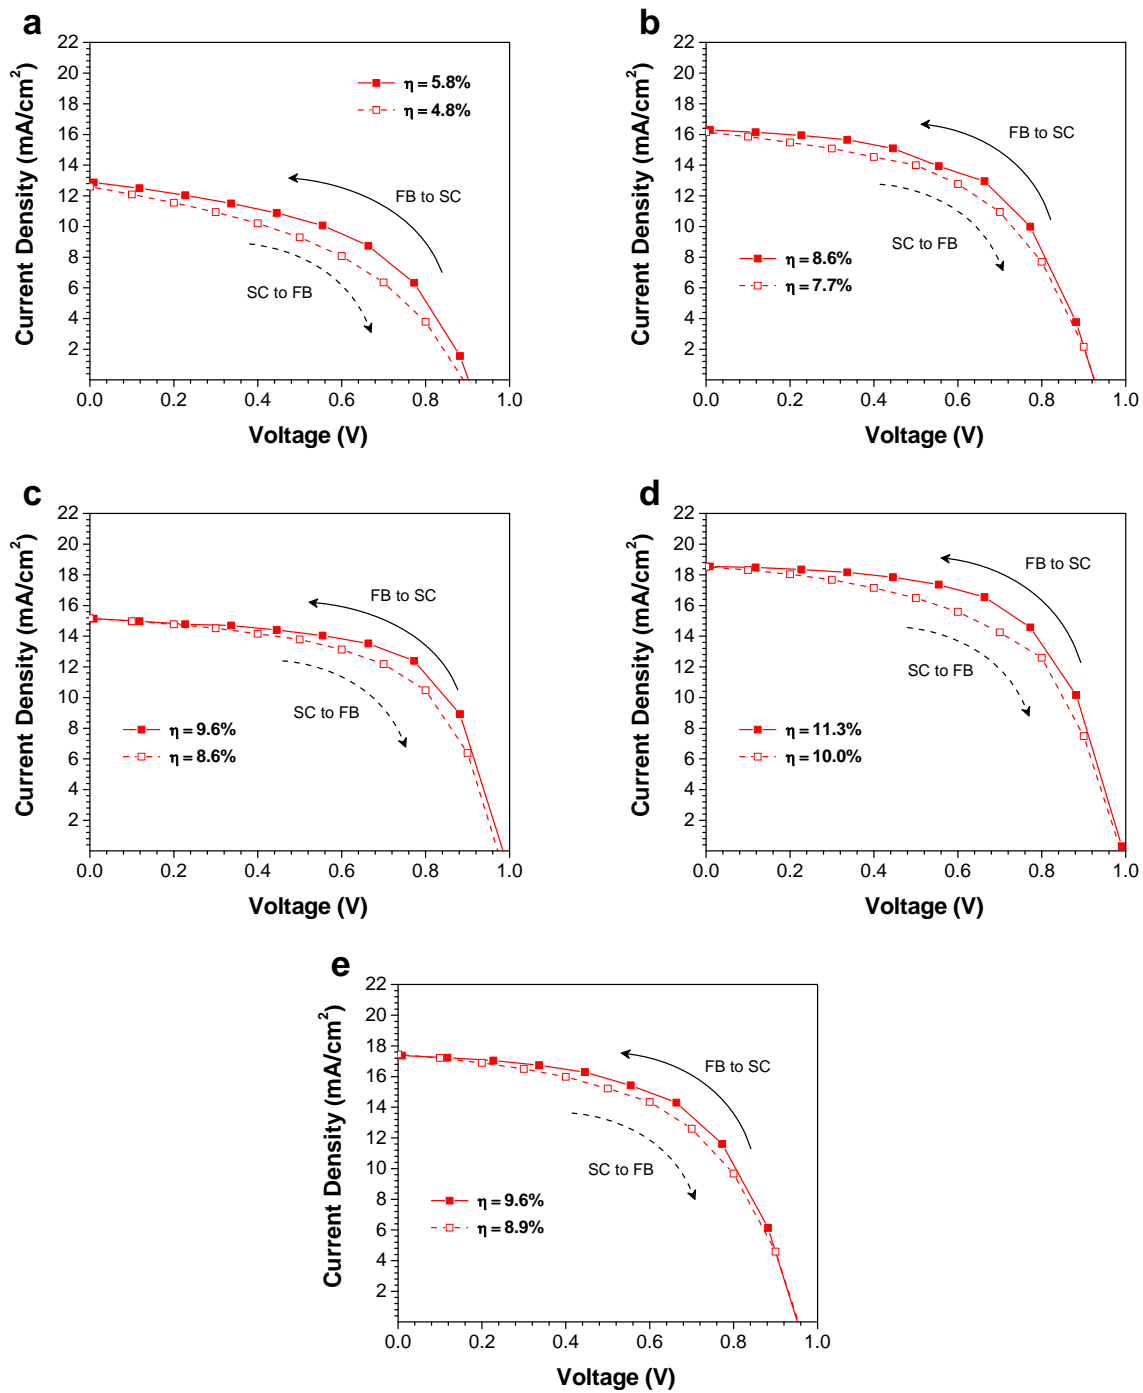

Figure S1.  $J$ - $V$  curves measured at 0.1 V/s for devices prepared at: (a) 1%, (b) 20%, (c) 30%, (d) 40%, and (e) 60% RH.
